1

2

1

2

3

4

5 **mTORC1 hyperactivation causes sensory integration deficits**  
6 **due to habenula impairment**

7

8 Olga Doszyn<sup>1,2</sup>, Magdalena Kedra<sup>1,2</sup>, Justyna Zmorzynska<sup>1\*</sup>

9

10 <sup>1</sup>Laboratory of Molecular and Cellular Neurobiology, International Institute of Molecular and Cell  
11 Biology in Warsaw

12 <sup>2</sup> equal contribution

13 \*corresponding author: Justyna Zmorzynska

14 **Email:** [jzmorzynska@iimcb.gov.pl](mailto:jzmorzynska@iimcb.gov.pl)

15

16 **Author Contributions (CRediT):** OD: Investigation, Formal analysis, Writing – Review & Editing;  
17 MK: Investigation, Formal analysis; JZ: Conceptualization, Investigation, Formal analysis,  
18 Writing – Original Draft, Writing – Review & Editing, Visualization, Supervision, Project  
19 administration, Funding acquisition.

20 **Competing Interest Statement:** The authors declare no competing interests.

21 **Classification:** Biological sciences, neuroscience;

22 **Keywords:** mTORC1 hyperactivation, habenula, Tuberous Sclerosis Complex (TSC)

23 **This file includes:**

24 Main Text **1417**

25 Figures **1 to 4**

26

27

28

29

30

3

1

4

5

6

## 31 **Abstract**

32 Mechanistic target of rapamycin complex 1 (mTORC1) is an integration hub for extracellular and  
33 intracellular signals necessary for proper brain development. Hyperactivation of mTORC1 is  
34 found in many developmental diseases, including autism spectrum disorder (ASD). Atypical  
35 reactivity to sensory stimuli is often found in patients with ASD. The most frequent hereditary  
36 cause of ASD is Tuberous Sclerosis Complex (TSC), in which inactivating mutations in the *TSC1*  
37 or *TSC2* genes result in hyperactivation of the mTORC1 pathway. We have discovered that the  
38 zebrafish model of TSC, *tsc2<sup>vu242/vu242</sup>* mutants lack light preference, a behavior requiring  
39 integration of multiple sensory inputs. Here, we show that the lack of light preference in  
40 *tsc2<sup>vu242/vu242</sup>* zebrafish is caused by aberrant sensory integration of light stimuli in the left dorsal  
41 habenula. Single-cell calcium imaging analysis revealed that *tsc2<sup>vu242/vu242</sup>* fish showed impaired  
42 function of the left dorsal habenula, in which neurons exhibited higher activity and lacked  
43 habituation to the light stimuli resulting in atypical response to light. Lack of light-preference  
44 behavior and abnormal neuronal activity in the left dorsal habenula were rescued by rapamycin,  
45 indicating that hyperactive mTORC1 causes aberrant habenula function and impaired sensory  
46 integration resulting in lack of light preference. Our results link sensory integration deficits seen in  
47 TSC patients suffering from ASD with hyperactive mTORC1 and suggest that mTORC1  
48 hyperactivity contributes to atypical reactivity to sensory stimuli in ASD.

49

50

## 51 **Main Text**

52

### 53 **Introduction**

54 Mechanistic target of rapamycin complex 1 (mTORC1) is an integration hub for extracellular and  
55 intracellular signals that controls cell homeostasis by regulating translation, protein degradation,  
56 transcription and RNA processing, and cytoskeleton dynamics [1]. mTORC1 is necessary for  
57 proper brain development and coordinates proliferation, migration, differentiation,  
58 synaptogenesis, and neuronal activity in the brain [1]. Hyperactivation of mTORC1 is a hallmark  
59 of many developmental diseases, including autism spectrum disorder (ASD), which has a  
60 prevalence of 1% in general population. ASD symptoms include social deficits, atypical reactivity  
61 to sensory stimuli, repetitive behaviors, and speech delay [2–4].

62 Tuberous Sclerosis Complex (TSC) is an exemplary genetic disease with mTORC1  
63 hyperactivation. Inactivating mutations in the *TSC1* or *TSC2* genes cause lack of functional  
64 TSC1-TSC2 complex and result in hyperactivation of mTORC1 pathway [1]. Patients with TSC  
65 suffer from epilepsy, benign tumors, and TSC-associated neuropsychiatric disorders (TANDs).  
66 These neuropsychiatric disorders occur in more than 90% of the TSC patients and do not fully  
67 correlate with tumor or seizure burden (reviewed in [5]). Approximately 40% of TSC patients have  
68 ASD, which makes TSC the most frequent hereditary cause of ASD [6]. However, the underlying  
69 pathomechanisms of TSC-associated ASD are still obscure.

70 Aberrant sensory processing leading to “sensory overload” is a hallmark of ASD [7],  
71 however, the mechanism underlying this deficit is not fully understood. Individuals with ASD often  
72 attempt to avoid visual stimulation [8] and show high levels of mTORC1 activity [3]. We  
73 investigated light processing in the light preference paradigm in the zebrafish model of TSC [9] to  
74 identify mTORC1 as an underlying cause for aberrant activity of left dorsal habenula (LdHb) and  
75 atypical response to light in the light-preference test. Our results suggest that mTORC1  
76 hyperactivity contributes to atypical reactivity to sensory stimuli in ASD.

77

7

2

8

9

10

78

## 79 Results

80 The light-preference assay measures anxiety by comparing times spent in the light and dark  
81 compartments. Increased preference for light of zebrafish larvae is indicative of anxiety-like  
82 behavior. We have previously shown that *tsc2<sup>vu242/vu242</sup>* mutant zebrafish exhibit anxiety-like  
83 behavior and elevated cortisol levels [10]. However, in the light-preference assay, *tsc2<sup>vu242/vu242</sup>*  
84 fish did not present increased light preference indicative of anxiety (Fig.1A-C). They exhibited  
85 decreased light preference compared to wild-type (wt) siblings, which strongly preferred the light  
86 compartment, although the total time moving was similar among genotypes (Fig.1E). The  
87 *tsc2<sup>vu242/vu242</sup>* fish also did not exhibit visual problems [10]. The lack of light preference of  
88 *tsc2<sup>vu242/vu242</sup>* was not prevented by pretreatment with anxiolytic drug ANA-12 (Fig.1B-D), which  
89 was shown before to block anxiety-like behavior in *tsc2<sup>vu242/vu242</sup>* [10]. Thus, the lack of light  
90 preference was not associated with anxiety. The aberrant response to light in *tsc2<sup>vu242/vu242</sup>* was  
91 also not associated with seizures as anti-epileptic vigabatrin (VGN) did not inhibit this phenotype  
92 either (Fig.1B-D). Interestingly, the pretreatment with a direct mTorC1 inhibitor rapamycin  
93 reversed the aberrant light response of *tsc2<sup>vu242/vu242</sup>* mutants (Fig.1B,C). These results indicate  
94 that hyperactive mTorC1 underlies the lack of light-preference behavior of *tsc2<sup>vu242/vu242</sup>* fish.

95 The lack of light preference in the *tsc2<sup>vu242/vu242</sup>* mutants, otherwise exhibiting increased  
96 anxiety-like behaviors, can be indicative of impaired sensory processing of the light stimulus or  
97 impaired integration of sensory input and internal states which converge to an aberrant behavioral  
98 response, resulting in decreased light preference. Habenula integrates various stimuli and  
99 regulates light-preference behavior [11–13]. To confirm mTorC1 hyperactivity in the habenulae of  
100 the *tsc2<sup>vu242/vu242</sup>*, we checked phosphorylation levels of its downstream target: ribosomal protein  
101 s6 (Rps6). We found that the number of cells positive for phosphorylated Rps6 (pRps6) in the  
102 *tsc2<sup>vu242/vu242</sup>* mutants was increased specifically in left dorsal habenula (LdHb) compared to wt  
103 siblings (Fig.2A,B). Also, the pRps6 intensity levels per cell were higher in the *tsc2<sup>vu242/vu242</sup>* LdHb  
104 neurons than in the wt siblings (Fig.2C). The pRps6 levels were decreased by rapamycin  
105 pretreatment in both *tsc2<sup>vu242/vu242</sup>* mutants and wt siblings (Fig.2).

106 LdHb contains light-responsive neurons and is responsible for mediating light-preference  
107 behavior in zebrafish larvae and its impairments result in lack of light preference [11, 13]. Thus,  
108 we performed 3D time-lapse imaging of the activity of LdHb neurons in  
109 *Tg(HuC:GCaMP5G);tsc2<sup>vu242</sup>* expressing GCaMP5G under neuron-specific promoter. The single-  
110 cell analysis revealed that neuronal activity in LdHb was increased in *tsc2<sup>vu242/vu242</sup>* mutants  
111 compared to wt siblings (Fig.3). Neuronal activity dynamics across time revealed that after light  
112 stimulation, the activity of neurons increased in wt LdHb but decreased over time indicative of  
113 habituation to constant light stimulus. In contrast, the activity of neurons in *tsc2<sup>vu242/vu242</sup>* LdHb was  
114 lower at the initial stimulation but increased over time (Fig.3C,D). Rapamycin pretreatment  
115 decreased neuronal activity of *tsc2<sup>vu242/vu242</sup>* LdHb (Fig.3) implicating mTorC1 hyperactivation in the  
116 aberrant LdHb activity.

11

3

12

13

14

117 The left habenula receives afferent inputs from the eminentia thalami (EmT), the pallium  
118 through stria medullaris (SM), and from the right habenula through the habenula commissure  
119 (HC) [11]. Therefore, we checked the development of these afferents in *tsc2<sup>vu242/vu242</sup>* mutants as  
120 its alterations could facilitate impaired LdHb function. The EmT fibers that innervate LdHb are  
121 calretinin-positive, thus, we checked anti-calretinin immunofluorescence in the LdHb in whole-  
122 mount brain preparations. We determined that the mean intensity of the anti-calretinin signal was  
123 similar across genotypes (Fig.4A), suggesting proper innervation of LdHb by EmT in the  
124 *tsc2<sup>vu242/vu242</sup>*. The immunofluorescence staining against acetylated Tubulin (AcTub) of whole-  
125 mount brain preparations revealed that the lateral input to habenulae through SM was not  
126 significantly changed in *tsc2<sup>vu242/vu242</sup>* compared to wt (Fig.4B). However, the HC was thinner in  
127 *tsc2<sup>vu242/vu242</sup>* compared to wt controls, and pretreatment with rapamycin reversed its width  
128 (Fig.4C,D) suggesting that right habenula input to LdHb may be impaired.

129

## 130 Discussion

131 We have shown that aberrant activity of LdHb neurons correlated with hyperactivation of the  
132 mTORC1 pathway and decreased light preference in the *tsc2<sup>vu242/vu242</sup>* mutants. The involvement of  
133 mTORC1 in neuronal activity is well documented and hyperactive mTORC1 consistently  
134 produces neuronal hyperexcitability and seizures [14]. The increased neuronal activity of LdHb  
135 neurons in *tsc2<sup>vu242/vu242</sup>* can be indicative of decreased activation threshold which is seen in the  
136 pallium of *tsc2<sup>vu242/vu242</sup>* and is responsible for seizures [10]. However, anti-epileptic VGB did not  
137 rescue light-preference behavior and rapamycin did reverse both, increased neuronal activity of  
138 LdHb neurons and light-preference behavior in *tsc2<sup>vu242/vu242</sup>* fish, suggesting that LdHb activity is  
139 not induced by seizures. Instead, hyperactive mTORC1 causes aberrant LdHb function and  
140 impairs sensory integration resulting in lack of light preference in *tsc2<sup>vu242/vu242</sup>* fish. LdHb  
141 integrates light stimuli from EmT and the right habenula with other inputs to produce light-  
142 preference behavior. In older zebrafish larvae, deactivation of LdHb by botulinum toxin decreased  
143 light preference, and activation of LdHb by optogenetic approach resulted in a preference for light  
144 in wt zebrafish [13]. In *tsc2<sup>vu242/vu242</sup>* fish, however, the LdHb activity is impaired – low at initial  
145 stimulation, but increasing in time. It suggests that the threshold for activation may be higher but  
146 results in higher neuronal activity when crossed or that the habituation to the light stimulus is  
147 impaired in *tsc2<sup>vu242/vu242</sup>*. It is possible that intracellular signaling pathways are abnormally  
148 functioning due to hyperactive mTORC1 and therefore the synaptic inputs to LdHb are not  
149 integrated properly or timely. Our results link sensory integration deficits with hyperactive  
150 mTORC1 and suggest that rapamycin derivatives can be used to prevent atypical reactivity to  
151 sensory stimuli in ASD.

152

## 153 Materials and Methods

### 154 Zebrafish breeding, genotyping, and behavior

155 The following zebrafish lines were used: *tsc2<sup>vu242/+</sup>* [9] and *tsc2<sup>vu242/+</sup>;Tg(HuC:GCaMP5G)* [10, 15].  
156 Adult and larval zebrafish were bred according to international standards. The larvae were  
157 genotyped as previously described [10]. Offspring of at least two parental pairs were used in each  
158 experiment. Light-dark box test was performed as previously [10]. Lack of movement of  
159 *tsc2<sup>vu242/vu242</sup>* mutants was mapped to non-motor seizures before [10], thus, not moving fish were  
160 excluded from the analysis. The light preference index was calculated as cumulative time spent in  
161 the dark compartment subtracted from cumulative time spent in the light compartment and  
162 divided by the total time of movement ((L-D)/(L+D)) [13].

163

15

4

16

17

18

## 164 *Additional Materials and Methods*

165 Additional information about drug treatments, brief protocols for methods, and statistical analysis  
166 can be found in SI Appendix.

167

## 168 *Material and Data Availability*

169 The manuscript and SI Appendix contain all data with the representative images to evaluate the  
170 conclusions and to reproduce the analysis. The fish lines and materials are available publicly or  
171 from the corresponding author. The single-cell calcium imaging analysis data will be made  
172 available on Github upon publication.

## 173 **Acknowledgments**

174 We thank Kevin Ess (Vanderbilt University) for *tsc2<sup>vu242/+</sup>* and Michael Orger (Champalimaud  
175 Foundation) for *Tg(HuC:GCaMP5G)*, the IIMCB ZCF for assistance with the adult fish, Tomasz  
176 Węsierski for Lightsheet Z.1 maintenance, and Angelika Jocek for administrative help. This work  
177 was supported by OPUS grant no. 2020/37/B/NZ3/02345 (OD, JZ) and ETIUDA grant no.  
178 2020/36/T/NZ3/00132 (MK), both from National Science Centre, Poland.

179

## 180 **References**

- 181 [1] K. Switon, K. Kotulska, A. Janusz-Kaminska, J. Zmorzynska, and J. Jaworski, "Molecular neurobiology of  
182 mTOR," *Neuroscience*, vol. 341, Jan. 2017, doi: 10.1016/j.neuroscience.2016.11.017.
- 183 [2] C. Onore, H. Yang, J. van de Water, and P. Ashwood, "Dynamic Akt/mTOR Signaling in Children with Autism  
184 Spectrum Disorder," *Frontiers in Pediatrics*, vol. 5, Mar. 2017, doi: 10.3389/fped.2017.00043.
- 185 [3] A. Sato, "mTOR, a Potential Target to Treat Autism Spectrum Disorder," *CNS & Neurological Disorders - Drug  
186 Targets*, vol. 15, no. 5, pp. 533–543, May 2016, doi: 10.2174/1871527315666160413120638.
- 187 [4] A. Sato and K. Ikeda, "Genetic and Environmental Contributions to Autism Spectrum Disorder Through  
188 Mechanistic Target of Rapamycin," *Biological Psychiatry Global Open Science*, vol. 2, no. 2, pp. 95–105, Apr. 2022, doi:  
189 10.1016/j.bpsgos.2021.08.005.
- 190 [5] D. M. Feliciano *et al.*, "A circuitry and biochemical basis for tuberous sclerosis symptoms: from epilepsy to  
191 neurocognitive deficits," *International Journal of Developmental Neuroscience*, vol. 31, no. 7, pp. 667–678, Nov. 2013, doi:  
192 10.1016/j.ijdevneu.2013.02.008.
- 193 [6] L. Leclezio and P. J. de Vries, "Advances in the treatment of tuberous sclerosis complex," *Current Opinion in  
194 Psychiatry*, vol. 28, no. 2, pp. 113–120, Mar. 2015, doi: 10.1097/YCO.000000000000136.
- 195 [7] L. M. Little, E. Dean, S. Tomchek, and W. Dunn, "Sensory Processing Patterns in Autism, Attention Deficit  
196 Hyperactivity Disorder, and Typical Development," *Physical & Occupational Therapy In Pediatrics*, vol. 38, no. 3, pp. 243–  
197 254, May 2018, doi: 10.1080/01942638.2017.1390809.
- 198 [8] E. J. Marco, L. B. N. Hinkley, S. S. Hill, and S. S. Nagarajan, "Sensory Processing in Autism: A Review of  
199 Neurophysiologic Findings," *Pediatric Research*, vol. 69, no. 5 Part 2, pp. 48R–54R, May 2011, doi:  
200 10.1203/PDR.0b013e3182130c54.
- 201 [9] S.-H. Kim, C. K. Speirs, L. Solnica-Krezel, and K. C. Ess, "Zebrafish model of tuberous sclerosis complex  
202 reveals cell-autonomous and non-cell-autonomous functions of mutant tuberin," *Disease Models & Mechanisms*, vol. 4,  
203 no. 2, Mar. 2011, doi: 10.1242/dmm.005587.
- 204 [10] M. Kedra, K. Banasiak, K. Kisielewska, L. Wolinska-Nizioł, J. Jaworski, and J. Zmorzynska, "TrkB hyperactivity  
205 contributes to brain dysconnectivity, epileptogenesis, and anxiety in zebrafish model of Tuberous Sclerosis Complex,"  
206 *Proceedings of the National Academy of Sciences*, vol. 117, no. 4, Jan. 2020, doi: 10.1073/pnas.1910834117.
- 207 [11] I. H. Bianco and S. W. Wilson, "The habenular nuclei: a conserved asymmetric relay station in the vertebrate  
208 brain," *Philosophical Transactions of the Royal Society B: Biological Sciences*, vol. 364, no. 1519, pp. 1005–1020, Apr.  
209 2009, doi: 10.1098/rstb.2008.0213.
- 210 [12] E. Dreosti, N. Vendrell Llopis, M. Carl, E. Yaksi, and S. W. Wilson, "Left-Right Asymmetry Is Required for the  
211 Habenulae to Respond to Both Visual and Olfactory Stimuli," *Current Biology*, vol. 24, no. 4, pp. 440–445, Feb. 2014, doi:  
212 10.1016/j.cub.2014.01.016.
- 213 [13] B. Zhang, Y. Yao, H. Zhang, K. Kawakami, and J. Du, "Left Habenula Mediates Light-Preference Behavior in  
214 Zebrafish via an Asymmetrical Visual Pathway," *Neuron*, vol. 93, no. 4, pp. 914–928.e4, Feb. 2017, doi:  
215 10.1016/j.neuron.2017.01.011.
- 216 [14] C. L. LaSarge and S. C. Danzer, "Mechanisms regulating neuronal excitability and seizure development  
217 following mTOR pathway hyperactivation," *Frontiers in Molecular Neuroscience*, vol. 7, Mar. 2014, doi:  
218 10.3389/fnmol.2014.00018.

19

5

20

21

22

219 [15] M. B. Ahrens, M. B. Orger, D. N. Robson, J. M. Li, and P. J. Keller, "Whole-brain functional imaging at cellular  
220 resolution using light-sheet microscopy," *Nature Methods*, vol. 10, no. 5, May 2013, doi: 10.1038/nmeth.2434.

221

23

6

24



25

26

222 **Figures**

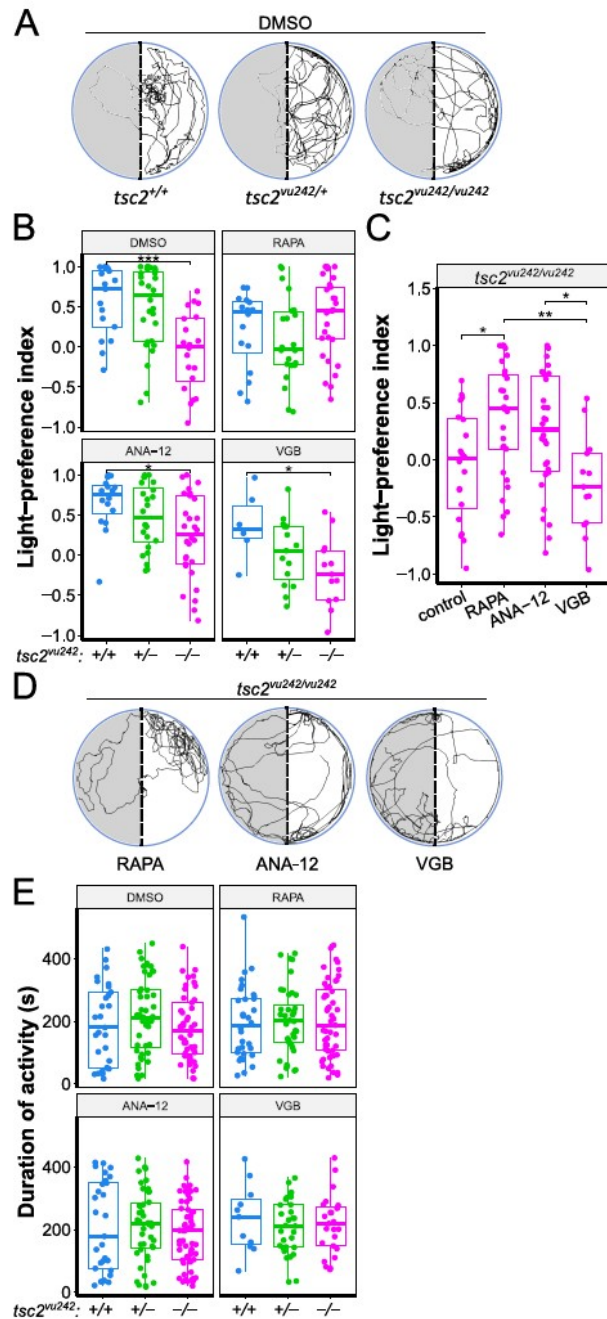

224 **Figure 1. Light-preference test in *tsc2*<sup>vu242</sup> fish.**

225 A. Exemplary tracks of *tsc2*<sup>vu242</sup> fish from the light-preference test. B. Light-preference index in  
226 *tsc2*<sup>vu242</sup> fish. C. Light-preference index in *tsc2*<sup>vu242/vu242</sup> mutants with comparison statistics between  
227 treatments. D. Exemplary tracks of *tsc2*<sup>vu242/vu242</sup> mutant treated with rapamycin (RAPA), ANA-12,  
228 or VGB from the light-preference test. E. Cumulative activity of *tsc2*<sup>vu242</sup> fish during the light-  
229 preference test.

27

28

7

29

30

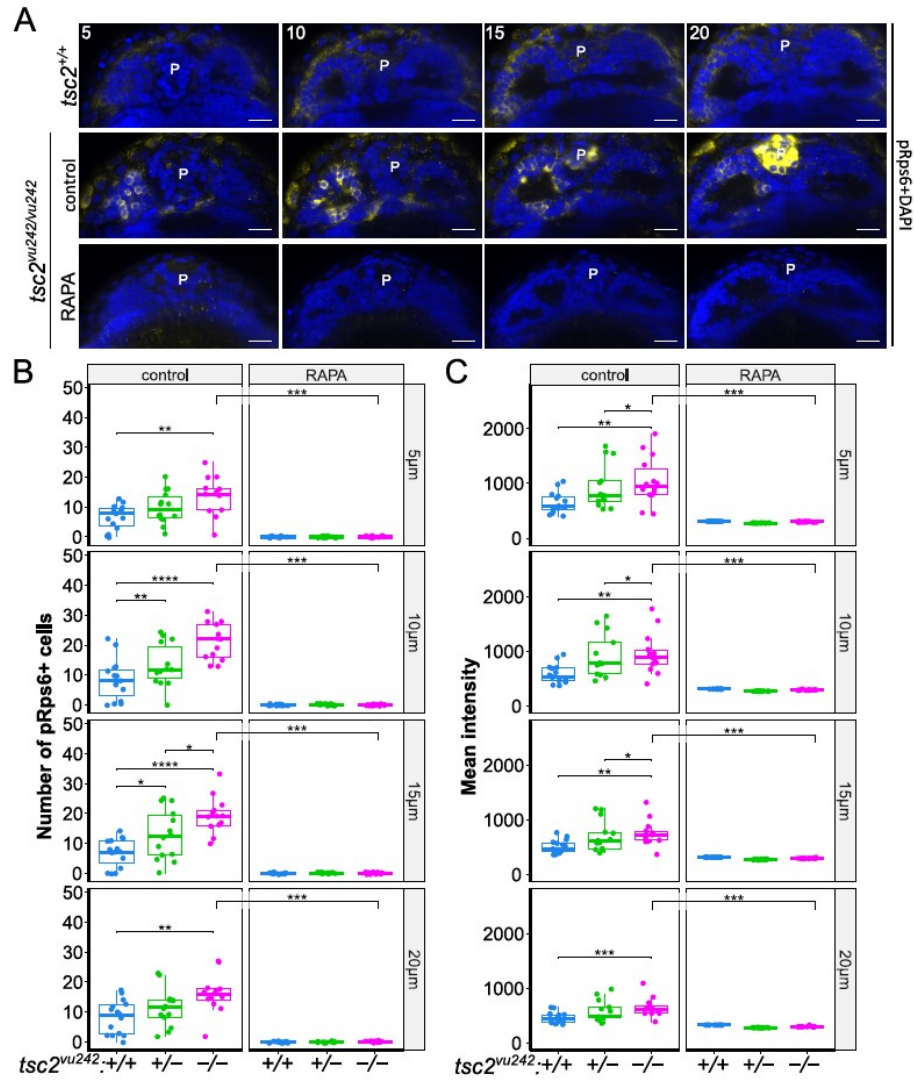

231 **Figure 2. mTorC1 activation in *tsc2*<sup>vu242</sup> fish.**

232 A. Representative optical sections through habenula of *tsc2*<sup>vu242</sup> fish at 5, 10, 15, and 20 μm from  
 233 the top. PRps6 – yellow, nuclei – blue. P – pineal complex. Scale bars, 20 μm. B. Number of  
 234 pRps6-positive cells in LdHb of *tsc2*<sup>vu242</sup> fish. C. Quantification of mean intensity of pRps6  
 235 fluorescence from LdHb of *tsc2*<sup>vu242</sup> fish.

31

32

8



33

34

236

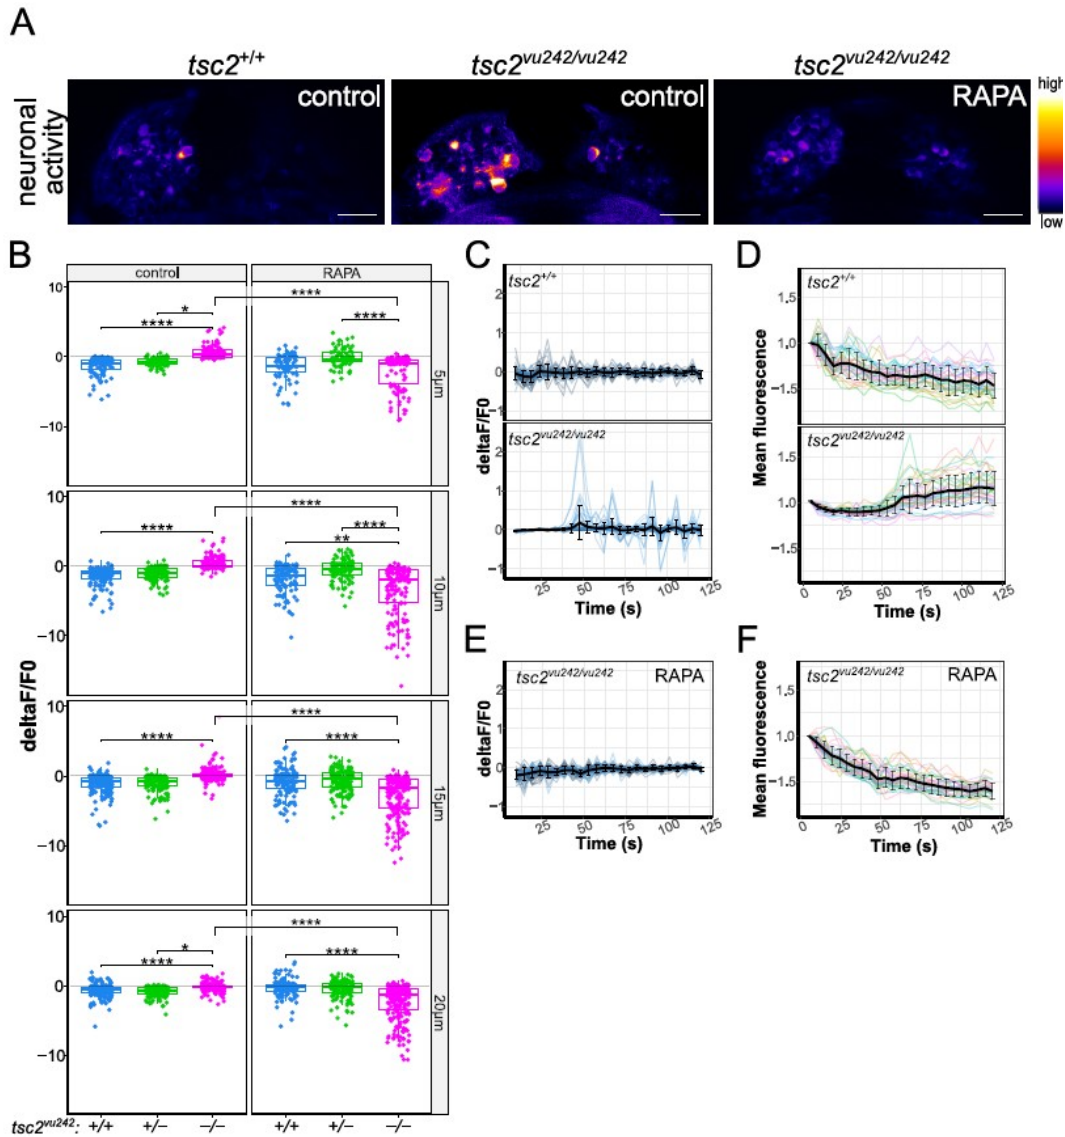

237 **Figure 3. Neuronal activity in LdHb in *tsc2*<sup>vu242</sup> fish.**

238 A. Representative images of neuronal activity in the habenulae of *tsc2*<sup>vu242</sup> fish at 10 μm from the  
 239 top. Scale bars, 20 μm. B. Cumulative activity of the *tsc2*<sup>vu242</sup> LdHb. C. Neuronal activity change  
 240 over time in the *tsc2*<sup>vu242</sup> LdHb at 10 μm from the top. D. Normalized mean GCaMP fluorescence  
 241 over time in the *tsc2*<sup>vu242</sup> LdHb at 10 μm from the top. E. Neuronal activity change over time in the  
 242 *tsc2*<sup>vu242/vu242</sup> mutant's LdHb at 10 μm from the top after RAPA pretreatment. F. Normalized mean  
 243 GCaMP fluorescence over time in the *tsc2*<sup>vu242/vu242</sup> mutant's LdHb at 10 μm from the top after  
 244 RAPA. C-F. The mean with SD is shown in black.

35

36

9

37

38

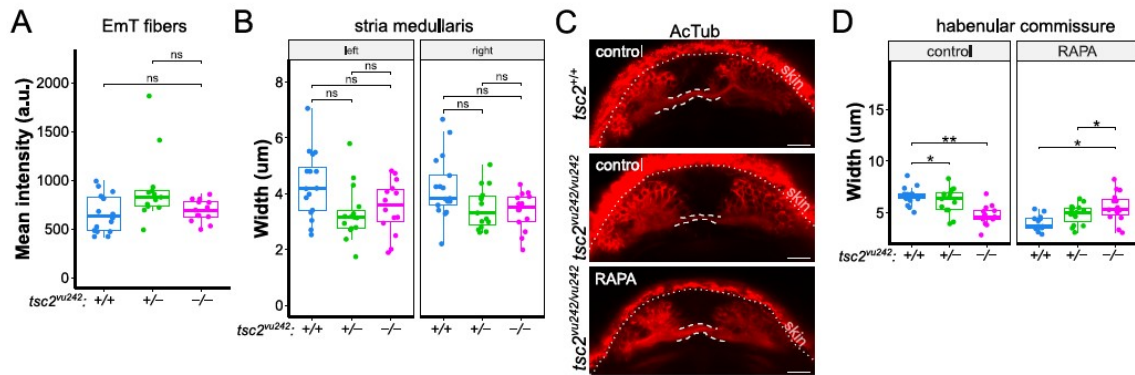

246 **Figure 4. Afferent connectivity of LdHb in *tsc2<sup>vu242</sup>* fish.**

247 A. Mean intensity of calretinin fluorescence in the left habenulae of *tsc2<sup>vu242</sup>* fish. B. Width of stria  
248 medullaris in *tsc2<sup>vu242</sup>* fish. C. Representative horizontal optical sections through HC (outlined) of  
249 *tsc2<sup>vu242</sup>* fish (projection of 8 z-stacks). Scale bars, 20 um. D. HC width of *tsc2<sup>vu242</sup>* fish.

39

10

40
